# Supplementary material
Source: publisher figshare collection journal article supplement (https://acs.figshare.com/ndownloader/files/5765778)
Supplement: Supplementary file 1 [file 5765778]

## Experimental Details

**Reaction of Si(111)-H with ethyl undecylenate.** Shards of Si(111) were first cleaned in a mixture of 30 percent hydrogen peroxide and concentrated sulfuric acid (clean room grade, 1:3 v/v) at 100°C for 20 minutes. After copious rinsing with MilliQ water the shards were placed in a previously deoxygenated solution of 40 percent ammonium fluoride (Olin, 10 ppb) for 15 minutes. The shard was carefully removed and transferred under argon, into a Schlenk tube containing 3ml of deoxygenated ethyl undecylenate, and irradiated in a Rayonet reactor for 3 hours. The functionalized substrate was rinsed with THF, MilliQ water and trichloroethane.

**Ester hydrolysis.** The ester functionalized surface was placed in a teflon vial containing 10ml of 2.4N HCl and warmed to 70°C for 2 hours. The vial was cooled down to room temperature and the substrate was rinsed with MilliQ water, THF and trichloroethane.

**Reaction with glycine methylester.** In a Schlenk tube, were placed 0.5g (4 mmoles) of glycine methylester hydrochloride, 1.7 ml (12 mmoles) of triethylamine, 2 ml (12.8 mmoles) of 1,3-diisopropylcarbodiimide and 12 ml of CHCl<sub>3</sub>. The acid-terminated surface was immersed in the solution and warmed for 18 hours at 50°C. The silicon substrate was then rinsed at room temperature with ethanol, tetrahydrofuran and trichloroethane.

**Preparation of the alcohol-terminated surface.** The ester-modified surface (prepared as above) was transferred under argon in a Schlenk tube containing 9ml of sodium borohydride 0.5M in methoxyether and warmed to 85°C for 4 hours. The substrate was then rinsed with ethanol, MilliQ water, tetrahydrofuran and trichloroethane.

**Reaction of the alcohol-modified surface with acetyl chloride.** The alcohol-terminated substrate was transferred under argon into teflon vial containing 10 ml of acetyl chloride, and allowed to react at 50°C for 14 hours. The excess of acetyl chloride was removed by rinsing, at room temperature, with ethanol, tetrahydrofuran and trichloroethane.

**Reaction of the ester-modified surface with decyl magnesium bromide.** The ester-functionalized surface was transferred into a Schlenk tube under argon. A solution of decyl magnesium bromide 1.0 M in diethyl ether was added until the substrate was fully covered. After 24 hours at 90°C, the substrate was rinsed, at room temperature, with 1% CF<sub>3</sub>COOH solution in THF, MilliQ water, THF and trichloroethane to yield a surface terminated with an alcohol function. The tertiary alcohol was esterified with acetyl chloride using the procedure outlined above.

### **X-Ray Photoelectron Spectroscopy**

X-ray photoelectron spectra (XPS) were recorded on a Kratos Axis Instrument, using monochromated AlK $\alpha$  (1486 eV) radiation with detection on the surface normal. The pressure during analysis was about  $5 \times 10^{-8}$  Torr. The XP survey spectrum for the amide modified surface is shown in Figure 1S. The high resolution spectra for Si<sub>2p</sub>, O<sub>1s</sub>, N<sub>1s</sub> and C<sub>1s</sub> are shown in Figure 2S. Estimated atomic percentages of the elements are given in Table 1S.

### Atomic Force Microscopy

Atomic force microscopy was carried out using a Molecular Imaging PicoSPM equipped with an environmental chamber and a Nanoscope IIIa controller (Digital Instruments). The sample was kept in an Argon environment for all measurements. AFM images were acquired at 1 Hz in contact mode using silicon nitride sharpened tips (Digital Instruments,  $0.12 \text{ N m}^{-1}$ ) at a constant force of 1 to 2 nN. Images are leveled but otherwise unfiltered. An AFM image of the ester modified surface is shown in Figure 3S.

Table 1S. XP Intensity data for the  $\text{Si}(111)\text{-C}_{10}\text{H}_{20}\text{C}(\text{O})\text{NHCH}_2\text{CO}_2\text{Me}$  surface.

| Peak             | Position (eV) <sup>a</sup> | Raw Area | Sensitivity Factor | Atomic Conc. (%) | Normalized Atomic Conc. (%) <sup>a</sup> |
|------------------|----------------------------|----------|--------------------|------------------|------------------------------------------|
| $\text{Si}_{2p}$ | 99.34                      | 4319     | 0.27               | 55.2             | -                                        |
|                  | 99.95                      | 2954     |                    |                  |                                          |
| $\text{O}_{1s}$  | 532.09                     | 2455     | 0.66               | 9.33             | 3.7 (3)                                  |
|                  | 534.15                     | 546      |                    |                  |                                          |
| $\text{N}_{1s}$  | 400.13                     | 503      | 0.42               | 2.46             | 1 (1)                                    |
| $\text{C}_{1s}$  | 284.86                     | 3004     | 0.25               | 32.98            | 13.4 (14)                                |
|                  | 286.65                     | 440      |                    |                  |                                          |
|                  | 288.20                     | 345      |                    |                  |                                          |
|                  | 289.58                     | 231      |                    |                  |                                          |

<sup>a</sup>The peak positions and intensities were determined using a standard deconvolution procedure.

<sup>b</sup>The expected atomic concentration is in parentheses.

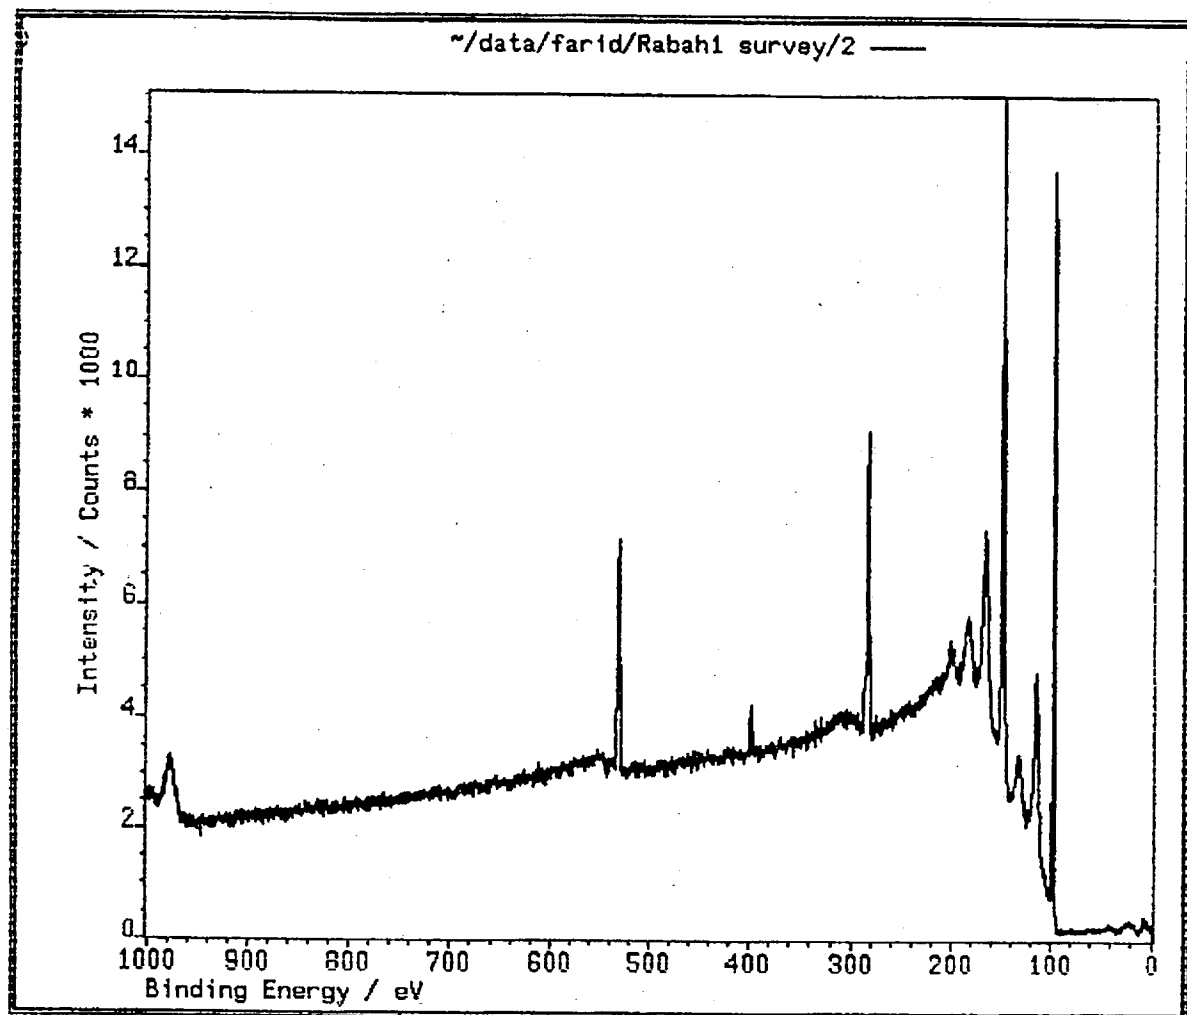

Figure 1S. XP survey spectrum of a Si(111)-C<sub>10</sub>H<sub>20</sub>C(O)NHCH<sub>2</sub>CO<sub>2</sub>Me surface.

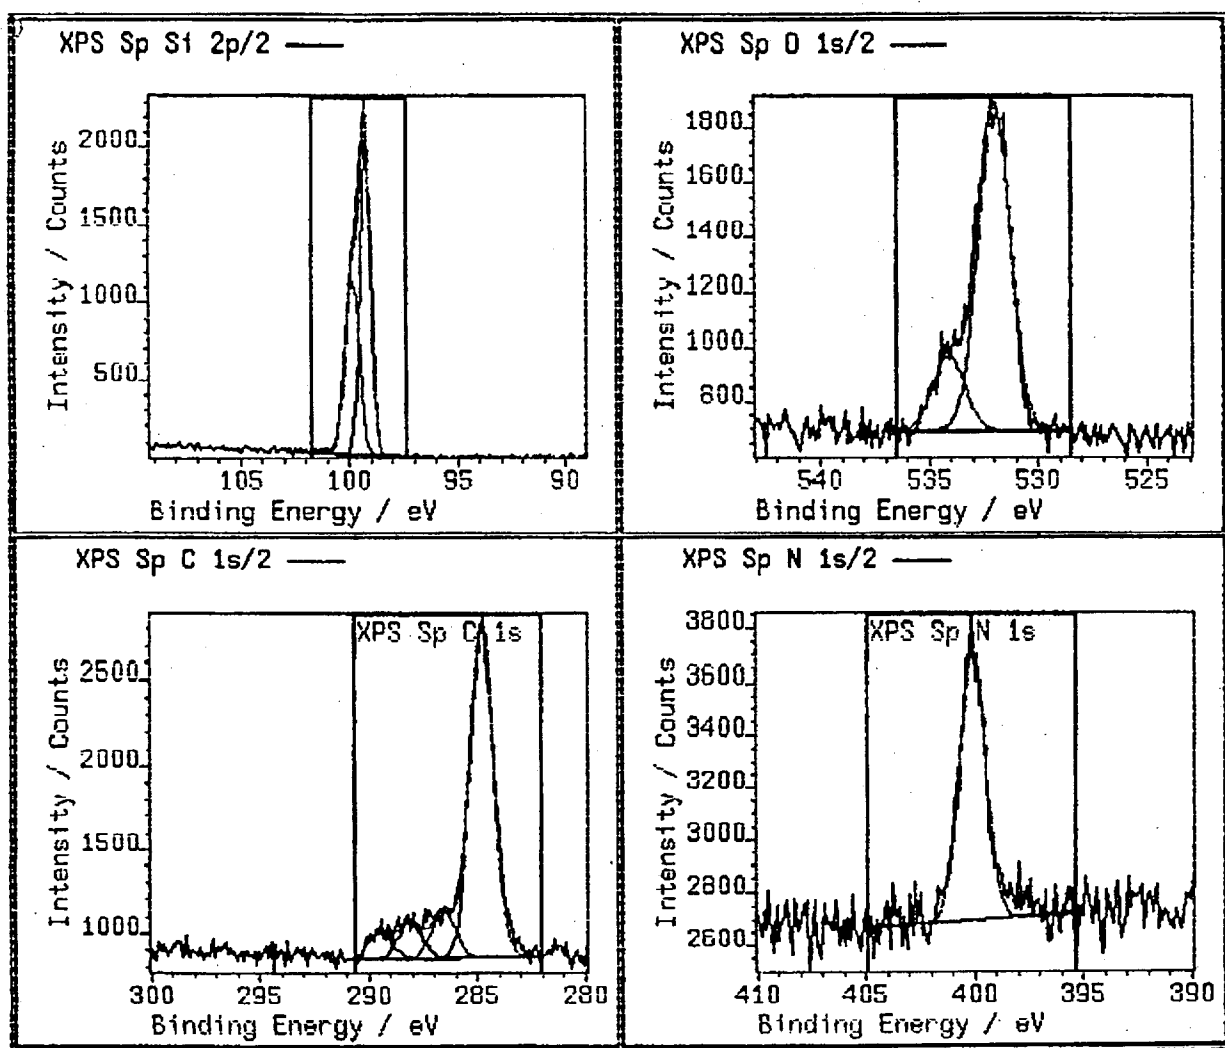

Figure 2S. High resolution XP spectra of the Si<sub>2p</sub>, O<sub>1s</sub>, C<sub>1s</sub> and N<sub>1s</sub> peaks. Deconvolution was carried out with the assumption that the line widths are invariant for a given element.

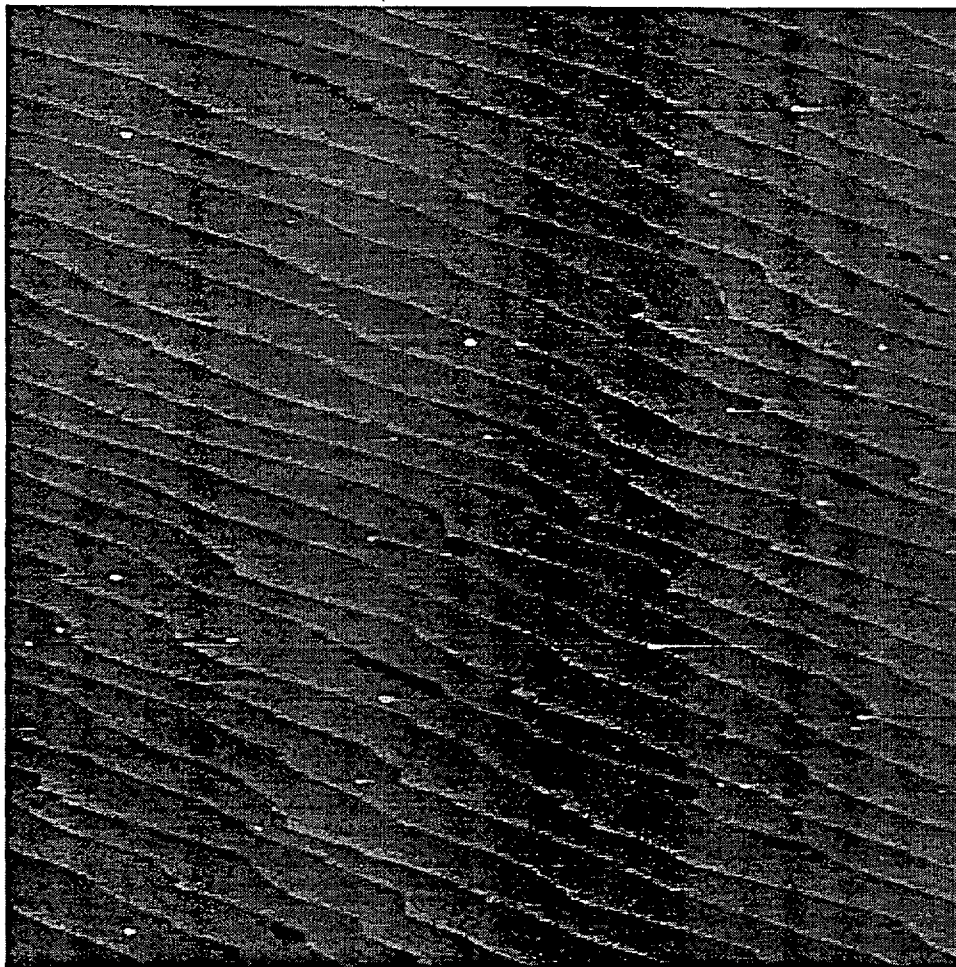

Figure 3S. Contact mode AFM image ( $5 \times 5 \mu\text{m}^2$ ) of the ester modified surface, Si(111)- $\text{C}_{10}\text{H}_{20}\text{CO}_2\text{H}$ . The image has been flattened but not leveled in order to be able to view all of the terraces. The step height as measured by AFM is  $0.31 \pm 0.02 \text{ nm}$ . This and other images demonstrate that the surfaces are atomically flat on the tens of micron scale.
